# Supplementary material for: Survey of US Patients with Multiple Sclerosis: Comparison of the New Electronic Interferon Beta-1b Autoinjector (BETACONNECT™) With Mechanical Autoinjectors
Source: PubMed Central journal article supplement — Neurol Ther. 2016 Jun 8;5(2):155–67. doi: 10.1007/s40120-016-0047-3 (PMC5130914; doi:10.1007/s40120-016-0047-3), 2016-06-08
Supplement: 40120_2016_47_MOESM1_ESM.pdf [file 40120_2016_47_MOESM1_ESM.pdf]

## SUPPLEMENTARY MATERIAL

**Table S1. Autoinjector attributes.**

| <b>Full attribute wording posed to survey respondents</b>                                 | <b>Abbreviation used in Figures 2 and 3</b> |
|-------------------------------------------------------------------------------------------|---------------------------------------------|
| 1. Minimal steps to prepare the autoinjector for use                                      | Minimal steps to prepare autoinjector       |
| 2. Autoinjector reminds me when to take my next injection                                 | Reminder function                           |
| 3. Autoinjector is comfortable to hold during injections                                  | Comfortable to hold                         |
| 4. Autoinjector has a modern look and feel                                                | Modern look and feel                        |
| 5. Autoinjector has features to prevent an accidental injection                           | Prevents accidental injections              |
| 6. Ability to adjust the injection speed                                                  | Adjustable injection speed                  |
| 7. Ability to adjust the injection depth                                                  | Adjustable injection depth                  |
| 8. Ability to reach different body sites with the autoinjector                            | Can reach different sites                   |
| 9. Ability to use the autoinjector without help from others                               | Use autoinjector without help               |
| 10. Easy to apply the right pressure to start the injection                               | Easy pressure application to start          |
| 11. Easy to push the button to start the injection                                        | Push start button easily                    |
| 12. Sound of injection is minimal (quiet)                                                 | Quiet injection                             |
| 13. Easy to tell when the injection starts and ends                                       | Know when injection starts and ends         |
| 14. Has visual cues that can be easily seen to show the progress of the injection         | Visual cues                                 |
| 15. Has audible cues that can be easily heard to show the progress of the injection       | Audible cues                                |
| 16. Ability to know when it is ok to pull the needle out after the injection is completed | Know when to remove needle                  |
| 17. Autoinjector is intuitive to use                                                      | Intuitive to use                            |
| 18. Injection process is easy overall                                                     | Injection process easy overall              |

Patients were presented with a list of 18 possible autoinjector attributes and asked how important each would be in an ideal autoinjector by rating them from 1 (not important) to 10 (most important) and instructed to only assign the maximum rating of 10 to one attribute. They then rated how their own autoinjector performed across the same attributes, rating from 1 (not well at all) to 10 (very well). Finally, after a BETACONNECT demonstration and “simulated injections”, they rated the BETACONNECT across these attributes, from 1 (not well at all) to 10 (very well).

**Table S2. Comparison of current autoinjector with BETACONNECT.**

| <b>Full statement wording posed to survey respondents</b>                                                                                     | <b>Abbreviation used in Figure 4</b>              |
|-----------------------------------------------------------------------------------------------------------------------------------------------|---------------------------------------------------|
| 1. I will be able to use more injection sites with the new autoinjector than with my current autoinjector                                     | Will be able to use more injection sites          |
| 2. The new autoinjector will allow me to be more independent                                                                                  | Increases independence                            |
| 3. I will require less assistance with injections with the new autoinjector than with my current autoinjector                                 | Requires less assistance                          |
| 4. The new autoinjector is more comfortable to handle during injections than my current autoinjector                                          | More comfortable to handle                        |
| 5. The new autoinjector offers greater ability to customize my injection than my current autoinjector                                         | Greater ability to customize injections           |
| 6. Since I can customize the injection speed and depth, injections would likely be less painful with the new autoinjector                     | Customizing injection speed/depth may reduce pain |
| 7. I appreciate the potential to personalize the injection speed with the new autoinjector as it may help make the injection more comfortable | Adjusting injection speed may increase comfort    |
| 8. The sound that this new autoinjector makes when I press the button to start the injection is more user-friendly than my current injection  | Injection sound is more user-friendly             |
| 9. The lack of loud noise at the start of injection with the new autoinjector will reduce my anxiety around injections                        | Quiet injections will reduce anxiety              |
| 10. I will be less anxious with this new autoinjector                                                                                         | Less anxiety with new autoinjector                |
| 11. I am confident the new autoinjector will work properly due to the self-check function                                                     | Self-check feature will improve reliability       |
| 12. I like the automatic needle retraction feature because it eliminates any issue in having to pull the needle out myself                    | Automatic needle retraction is valuable           |
| 13. I am confident that the built-in dwell time will help me to know when the medication has been fully delivered                             | Built-in dwell time ensures full drug delivery    |
| 14. The new autoinjector is more self-explanatory to use due to the lights and button                                                         | Lights/button make operation self-explanatory     |
| 15. I will feel more comfortable injecting with the new autoinjector than with my                                                             | More comfortable injections                       |

|                                                                                           |                                                  |
|-------------------------------------------------------------------------------------------|--------------------------------------------------|
| current autoinjector                                                                      |                                                  |
| 16. The reminder function will reduce the chance of forgetting an injection               | Reminder reduces chance of forgetting injections |
| 17. I feel the new autoinjector may improve my adherence to my MS medication              | May improve adherence to medication              |
| 18. The new autoinjector has a better look and feel than my current autoinjector          | Better look and feel                             |
| 19. The injection process is easier with the new autoinjector vs. my current autoinjector | Injection process is easier                      |

Patients agreed or disagreed with the full statements by providing a rating from 1 (strongly disagree) to 10 (strongly agree).
